# Supplementary material for: Spectroscopic investigation of substrates contaminated by chemical warfare agents
Source: Royal Society of Chemistry journal article supplement (doi:10.1039/c5ja00333d), 2015-01-01
Supplement: c5ja00333d1.pdf [file c5ja00333d1.pdf]

## Supplementary Information:

### Spectroscopic investigation of substrates contaminated by Chemical Warfare Agents

Lars Landström, Lillemor Örebrand, Kristoffer Svensson, and Per Ola Andersson  
*CBRN Defence and Security, Swedish Defence Research Agency (FOI), SE-901 82 Umeå, Sweden*

#### Supplementary Figures

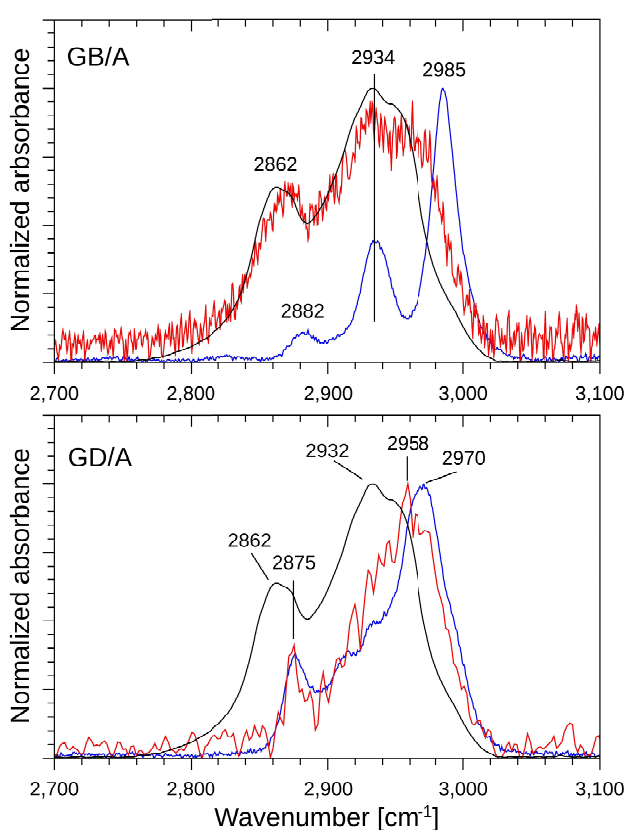

Figure S 1: Normalized ATR-FTIR spectra from the high frequency region. Black spectra corresponds to clean paint system A, blue spectra the neat agents and red spectra contaminated and ethanol rinsed paint system A, respectively.

## Supplementary Table

Table S I: Measured peaks from neat sarin and soman, assignments from Refs.[30,35].

| Sarin (GB)          | Soman (GD)          | Assignment                                 |
|---------------------|---------------------|--------------------------------------------|
| [cm <sup>-1</sup> ] | [cm <sup>-1</sup> ] |                                            |
| 721                 |                     |                                            |
|                     | 749                 | $\nu(\text{P-C})$                          |
| 777                 |                     |                                            |
| 835                 | 835                 | $\nu(\text{P-F})$                          |
| 885                 | 871                 | $\nu(\text{C-C-C})$                        |
| 905                 | 905                 | $\rho_{as}(\text{CH}_3\text{-P})$          |
| 922                 | 916                 | $\rho_{as}(\text{CH}_3\text{-P})$          |
|                     | 998                 | $\delta_s(\text{C-C-C})$                   |
| 1004                | 1012                | $\nu_{as}(\text{C-O-P})$                   |
|                     | 1077                |                                            |
| 1106                | 1117                |                                            |
| 1145                |                     | $\rho_{as}(\text{CH}_3\text{-C})$ i-Pr-P   |
| 1180                |                     | $\rho(\text{CH}_3\text{-C})$ i-Pr-P        |
| 1272                | 1279                | $\nu_s(\text{P=O})$                        |
| 1320                | 1320                | $\delta_s(\text{CH}_3\text{-P})$           |
| 1363                |                     | $\delta(\text{CH})$                        |
| 1379                | 1383                | $\delta_s(\text{CH}_3\text{-C})$ i-Pr-P    |
| 1390                | 1399                | $\delta_s(\text{CH}_3\text{-C})$ i-Pr-P    |
| 1419                | 1418                | $\delta_{as}(\text{CH}_3\text{-P})$        |
| 1457                | 1464                | $\delta_{as}(\text{CH}_3\text{-C})$ i-Pr-P |
| 1470                | 1482                | $\delta_{as}(\text{CH}_3\text{-C})$ i-Pr-P |
| 1733                | 1762                | $\nu(\text{C=O})$                          |
| 2882                | 2875                | $\nu(\text{CH})$                           |
| 2934                | 2932                | $\nu_s(\text{CH}_3)$                       |
| 2985                | 2970                | $\nu_{as}(\text{CH}_3)$                    |
